# 1 The global landscape of SARS-CoV-2 genomes, variants, and 2 haplotypes in 2019nCoV

3 Shuhui Song<sup>1,2,3,4,#</sup>, Lina Ma<sup>1,2,3,#</sup>, Dong Zou<sup>1,2,3,#</sup>, Dongmei Tian<sup>1,2,#</sup>, Cuiping Li<sup>1,2,#</sup>, Junwei  
4 Zhu<sup>1,2,#</sup>, Meili Chen<sup>1,2,3</sup>, Anke Wang<sup>1,2</sup>, Yingke Ma<sup>1,2</sup>, Mengwei Li<sup>1,2,3,4</sup>, Xufei Teng<sup>1,2,3,4</sup>, Ying  
5 Cui<sup>1,2,3,4</sup>, Guangya Duan<sup>1,2,3,4</sup>, Mochen Zhang<sup>1,2,3,4</sup>, Tong Jin<sup>1,2,3,4</sup>, Chengmin Shi<sup>1,5</sup>, Zhenglin  
6 Du<sup>1,2,3</sup>, Yadong Zhang<sup>1,2,3,4</sup>, Chuandong Liu<sup>1,5</sup>, Rujiao Li<sup>1,2,3</sup>, Jingyao Zeng<sup>1,2,3</sup>, Lili Hao<sup>1,2,3</sup>,  
7 Shuai Jiang<sup>1,2</sup>, Hua Chen<sup>1,5</sup>, Dali Han<sup>1,5</sup>, Jingfa Xiao<sup>1,2,3,4</sup>, Zhang Zhang<sup>1,2,3,4,\*</sup>, Wenming  
8 Zhao<sup>1,2,3,4,\*</sup>, Yongbiao Xue<sup>1,2,4,\*</sup>, Yiming Bao<sup>1,2,3,4,\*</sup>

9  
10 <sup>1</sup> China National Center for Bioinformation, Beijing 100101, China

11 <sup>2</sup> National Genomics Data Center, Beijing Institute of Genomics, Chinese Academy of Sciences,  
12 Beijing 100101, China

13 <sup>3</sup> CAS Key Laboratory of Genome Sciences and Information, Beijing Institute of Genomics, Chinese  
14 Academy of Sciences, Beijing 100101, China

15 <sup>4</sup> University of Chinese Academy of Sciences, Beijing 100049, China

16 <sup>5</sup> CAS Key Laboratory of Genomic and Precision Medicine, Beijing Institute of Genomics, Chinese  
17 Academy of Sciences, Beijing 100101, China

18 <sup>#</sup>These authors contributed equally to this work.

19 <sup>\*</sup>Corresponding author ([baoym@big.ac.cn](mailto:baoym@big.ac.cn), [ybxue@big.ac.cn](mailto:ybxue@big.ac.cn), [zhaowm@big.ac.cn](mailto:zhaowm@big.ac.cn),  
20 [zhangzhang@big.ac.cn](mailto:zhangzhang@big.ac.cn))

21  
22 **Running title:** Song S et al /The genomic variants and haplotypes of SARS-CoV-2

23 Total word counts: 4477

24 Total References: 21

25 Total figures: 5

26 Total tables: 2

27 Total supplementary figures and tables: 3 (Figure S1, Figure S2, Table S1)

## 28 **Abstract**

29 On 22 January 2020, the National Genomics Data Center (NGDC), part of the China National  
30 Center for Bioinformation (CNCB), created the 2019 Novel Coronavirus Resource  
31 (2019nCoV), an open-access SARS-CoV-2 information resource. 2019nCoV features a  
32 comprehensive integration of sequence and clinical information for all publicly available  
33 SARS-CoV-2 isolates, which are manually curated with value-added annotations and quality  
34 evaluated by our in-house automated pipeline. Of particular note, 2019nCoV performs  
35 systematic analyses to generate a dynamic landscape of SARS-CoV-2 genomic variations at a  
36 global scale. It provides all identified variants and detailed statistics for each virus isolate, and  
37 congregates the quality score, functional annotation, and population frequency for each  
38 variant. It also generates visualization of the spatiotemporal change for each variant and  
39 yields historical viral haplotype network maps for the course of the outbreak from all  
40 complete and high-quality genomes. Moreover, 2019nCoV provides a full collection of  
41 SARS-CoV-2 relevant literature on COVID-19 (Coronavirus Disease 2019), including  
42 published papers from PubMed as well as preprints from services such as bioRxiv and  
43 medRxiv through Europe PMC. Furthermore, by linking with relevant databases in  
44 CNB-NGDC, 2019nCoV offers data submission services for raw sequence reads and  
45 assembled genomes, and data sharing with National Center for Biotechnology Information.  
46 Collectively, all SARS-CoV-2 genome sequences, variants, haplotypes and literature are  
47 updated daily to provide timely information, making 2019nCoV a valuable resource for the  
48 global research community. 2019nCoV is accessible at <https://bigd.big.ac.cn/ncov/>.

49  
50 **KEYWORDS:** 2019nCoV; SARS-CoV-2; Database; Genomic variation; Haplotype

## 52 **Introduction**

53 The severe respiratory disease COVID-19 [1], since its outbreak in late December 2019, has  
54 rapidly spread as a pandemic. As of 14<sup>th</sup> July 2020, 12,964,809 confirmed cases have been  
55 reported in 216 countries/territories/areas (WHO Situation Report Number 176;  
56 <https://www.who.int/emergencies/diseases/novel-coronavirus-2019/situation-reports/>). As the  
57 causative agent of COVID-19, SARS-CoV-2 samples have been extensively isolated and

58 sequenced by different countries and laboratories [2], resulting in a considerable number of  
59 viral genome sequences worldwide. Therefore, public sharing and free access to a  
60 comprehensive collection of SARS-CoV-2 genome sequences is of great significance for  
61 worldwide researchers to accelerate scientific research and knowledge discovery and also  
62 help develop medical countermeasures and sensible decision-making [3].

63

64 To date, unfortunately, SARS-CoV-2 genome sequences generated worldwide were scattered  
65 around different database resources, primarily including the Global Initiative on Sharing All  
66 Influenza Data (GISIAD) [4] repository and NCBI GenBank [5]. Many sequences exist in  
67 multiple repositories but their updates are not synchronized. This makes it extremely  
68 challenging for worldwide users to effectively retrieve a non-redundant and most updated set  
69 of sequence data, and to collaboratively and rapidly deal with this global pandemic. Towards  
70 this end, we constructed the 2019 novel coronavirus resource (2019nCoV-  
71 <https://bigd.big.ac.cn/ncov/>) in CNCB-NGDC, with the purpose to provide public, free, rapid  
72 access to a complete collection of non-redundant global SARS-CoV-2 genomes by  
73 comprehensive integration and value-added annotation and analysis [6]. Since its inception on  
74 22 January 2020, 2019nCoV- is updated on daily basis, leading to unprecedentedly dramatic  
75 data expansion from 86 genomes in its first release to 64,789 genomes in its current version  
76 (as of 14<sup>th</sup> July 2020). Moreover, it has been greatly upgraded by equipping with enhanced  
77 data curation and analysis pipelines and online functionalities, including data quality  
78 evaluation, variant calling, variant spatiotemporal dynamic tracking, viral haplotype  
79 construction, and interactive visualization with more friendly web interfaces (Table 1). Here  
80 we report these significant updates of 2019nCoV- and present the global landscape of  
81 SARS-CoV-2 genomes, variants and haplotypes.

82

### 83 **Database content and features**

#### 84 **Statistics of SARS-CoV-2 genome assemblies**

85 Since the outbreak of COVID-19, the number of SARS-CoV-2 genome sequences released  
86 globally has been increasing at an unprecedented rate. To facilitate public free access to all  
87 genome assemblies and help worldwide researchers better understand the variation and



transmission of SARS-CoV-2, we perform daily updates for 2019nCoVVR by integrating all available genomes throughout the world and conducting value-added curation and analysis (**Figure 1**). As of 14<sup>th</sup> July 2020, 2019nCoVVR hosted a total of 64,789 non-redundant genome sequences and provided a global distribution of SARS-CoV-2 genome sequences in 97 countries/regions across 6 continents (Figure 1A). Duplicated sequences from different databases are merged with all IDs cross-referenced. Sequences are contributed primarily by United Kingdom (28,823, 44.5%), United States (13,556, 20.9%), Australia (2351, 3.6%), Spain (1852, 2.9%), Netherlands (1605, 2.5%), India (1581, 2.4%), and China (1431, 2.2%). According to our statistics, SARS-CoV-2 genome sequences started to grow rapidly from mid-March ([https://bigd.big.ac.cn/ncov/release\\_genome](https://bigd.big.ac.cn/ncov/release_genome)), concordant with the outset of global pandemic of COVID-19. A full list of our sequence dataset including strain name, accession number and source is provided in Table S1.

To provide high-quality genome sequences that are critically essential for downstream analyses (ranging from variant calling to haplotype construction), we perform sequence integrity and quality assessment for all newly collected sequences. Among all released human-derived genome sequences (64,700), 60,970 (94.2%) are complete, and 31,689 (49%) are high-quality (with high coverage) (Figure 1B). Most of the low-quality sequences (29,281, 99.7%) contain different numbers of unknown bases (Ns). Among these sequences, 60% have 16-500 Ns (median 258), and 40% have more than 500 Ns (Figure 1C). Further investigation of the genomic locations reveals that some genomic regions have high coverage of Ns (Figure 1D). Sequence integrity and quality assessment results are available for all genome sequences, and can be used as filters for sequence browse and search.

### **Landscape of genomic variants**

Bases on 31,685 globally human-derived high-quality complete genome sequences (in what follows, only high-quality complete genome sequences are used for downstream analysis if not indicated otherwise), we investigate the landscape of SARS-CoV-2 genomic variants by comparison with the reference genome (MN908947.3 in NCBI) (**Figure 2**). By 14<sup>th</sup> July 2020, a total of 13,428 variants were identified, including 12,828 (95.5%) single nucleotide

polymorphisms (SNPs), 437 deletions, 116 insertions, and 47 indels (a combination of an insertion and a deletion, affecting 2 or more nucleotides) (Figure 2A). More than half of these SNPs (6770, 50.4%) are nonsynonymous, causing amino acid changes. To gain the functional effects of those missense variants of S spike protein from the perspective of spatial location (e.g. key functional domain or binding region), mutated amino acids are projected onto protein 3D structures, which can be viewed by 360 degree rotation (Figure 2B). We further explore the distributions of these variants across different genes. Noticeably, the three genes *ORF1ab*, *S*, and *N* accumulate more variants (Figure 2C) and SNP densities (i.e., the number of mutations per nucleotides in the gene region) are higher in several gene regions including *ORF7a*, *ORF3a*, *ORF6* and *N* (<https://bigd.big.ac.cn/ncov/variation/annotation>).

For each variant, we investigate its population mutation frequency (PMF, the ratio of the number of mutated genomes to the total number of complete high-quality genomes) (Figure 2D). Clearly, there are 62 variants with PMF > 1%, 18 variants with PMF > 5%, and 4 variants with PMF > 75.8% (that is, position 241 in 5'UTR, positions 3037 and 14,408 in *ORF1ab*, and 23,403 in *S*), potentially representing main prevalent virus genotypes across the global. All identified variants and their functional annotations are publicly accessible and an online pipeline for variant identification and functional annotation is provided and freely available at <https://bigd.big.ac.cn/ncov/analysis>.

### **Spatiotemporal dynamics of genomic variants**

To track the dynamics of SARS-CoV-2 genomic variants, particularly *de novo* mutations, we explore the spatiotemporal change of population frequency for each variant according to sampling time and location (Figure 3). Among the 18 sites with PMF > 5%, some are mutated simultaneously and in a linkage manner (Figure 3A), such as mutations at positions 8782 and 28,144 reported in [7]. Specifically, these two sites appeared in the early stage of the outbreak since 30 December 2019, and their mutation frequencies reach ~33% around 22 January 2020, and then gradually decline to 9.6% currently. Contrastingly, some variants appear only since the middle stage around 3 March 2020; such as the mutation at position 23,403 (provoking an amino acid change D614G of the *S* protein), is accompanied by three

other mutations, namely, a C-to-U mutation at position 241 in the 5'UTR, a silent C-to-U mutation in the gene *nsp3* at position 3037, and a missense C-to-U mutation in the gene *RdRp* at position 14,408 (P4715L). To facilitate users to investigate any variant of interest, we provide an interactive heatmap in 2019nCoV (https://bigd.big.ac.cn/ncov/variation/heatmap) to dynamically display and cluster the mutation patterns over all sampling dates, with customized options available that allow users to select specific variant frequency, annotated gene/region, variant effect type, and transcription regulation sequence (TRS).

155

Moreover, we investigate dynamic patterns of SARS-CoV-2 genomic variants across different sampling locations over time. Taking the variant at position 23,403 (D614G) as an example, its PMF has dramatically increased from 0 at the end of February to 76.2% right now, and the mutation pattern G614 has been gradually dominant along with the development of pandemic (Figure 3B), presumably indicating that the mutated genotypes may have higher transmissibility[8]. In terms of the absolute number of mutation patterns across different countries/regions, G614 emerges dominantly in Europe and North America (Figure 3C). (https://bigd.big.ac.cn/ncov/variation/annotation/variant/23403). When investigating the mutation pattern for each country (Figure 4), we find that sequences from some Asian countries (such as South Korea, Malaysia, and Nepal) have no or very few G614 mutation, whereas those from Europe and America (e.g. Argentina, Czech Republic and Serbia) do have the G614 pattern that is dominated among contemporary samples. In some countries, both the D614 and G614 patterns are co-circulating early in the epidemic, but the mutated pattern soon begins to be dominant such as in Australia, Belgium, Canada, Chile, France, Israel, United States and United Kingdom [8]. The accumulation of this mutation varies in different parts of the world, possibly due to the prevention and control measures adopted by some countries/regions. Taken together, 2019nCoV features spatiotemporal dynamics tracking of SARS-CoV-2 genomic variants and thus bears great potential to help decipher viral transmission and adaptation to the host [8].

175

## 176 Haplotype network construction and characterization

To better characterize the diversity of virus sequences, we build SARS-CoV-2 haplotypes

178 based on all identified variants beyond UTRs regions. As a result, 17,624 haplotypes were  
 179 identified from 31,685 complete high-quality genome sequences as of 14<sup>th</sup> July 2020. Based  
 180 on this, we construct a haplotype network for SARS-CoV-2 (**Figure 5**), a graphical  
 181 representation of genomic variations by inferring relationships between individual genotypes,  
 182 according to the principle of the shortest set of connections that link all nodes (genotypes)  
 183 where the length of each connection represents the genetic distance [9]. To provide a whole  
 184 picture of the pandemic transmission in a spatiotemporal manner, we visualize the  
 185 SARS-CoV-2 haplotype network by sample collection date and across different  
 186 countries/regions. It not only allows users to easily obtain a landscape of SARS-CoV-2  
 187 haplotypes and their relationships, but also helps users to navigate a set of haplotypes for a  
 188 specific country/region linking with additional associated information such as the number of  
 189 genomes, sampling time and location (Figure 5A).

190

191 According to the haplotype network, we classify all genome sequences into nine major  
 192 clusters (labelled as C01–C09; see Methods for details) (Figure 5B, 5C; **Table 2**). As the  
 193 ongoing pandemic spread of SARS-CoV-2, new branches that evolve and spread faster are  
 194 gradually emerging, such as clusters C04, C06, C08, and C09 (Table 2). The dominant  
 195 clusters are C06 (8681, 27.4%), C08 (7,889, 24.9%), and C09 (6,940, 21.9%) (Figure 5D),  
 196 which are characterized by those signature mutations of C241T, C3037T, C14408T, and  
 197 A23403G, and are defined as the G clade (as the mutation at position 23,403 provoking an  
 198 amino acid change D614G of S protein). These sequences have spread to 82 countries  
 199 worldwide, and become the main epidemic virus type in most countries in Europe, North  
 200 America, South America, Africa and West Asia, etc. For example, there were about 6827  
 201 (71.5%), 8305 (83.4%), and 970 (18.5%) sequences originated from the G clade in the United  
 202 States, United Kingdom, and China, respectively (Figure 5E). The wide spread and  
 203 prevalence of this clade in different countries may suggest the adaptability of the virus type to  
 204 human [8].

205

## 206 **Implementation**

207 2019nCoVVR was built based on B/S (Browser/Server) architecture. In the browser-side, it was

208 developed by JSP (Java Server Pages), HTML, CSS, AJAX (Asynchronous JavaScript and  
209 XML), JQuery (a cross-platform and feature-rich JavaScript library; <http://jquery.com>) as  
210 well as Semantic-UI (an open source web development framework; <https://semantic-ui.com>).  
211 In the server-side, it was implemented by using Spring Boot (a rapid application development  
212 framework based on Spring; <https://spring.io>). For data storage, MySQL (<https://mysql.com>)  
213 was used. For interactive visualization, HighCharts (a modern SVG-based, multi-platform  
214 charting library; <https://highcharts.com>), D3.js (a JavaScript library for manipulating  
215 documents based on data; <https://d3js.org>) and 3Dmol.js (a JavaScript library for visualizing  
216 protein structure associated with mutated amino acids) [21] were employed in 2019nCoV-2.  
217 The haplotype network was implemented by d3js, Leaflet (<http://leafletjs.com>), and Echarts  
218 (<http://echarts.baidu.com/>).

219

## 220 Discussion

221 Genome sequencing is vital to understand the epidemiology of SARS-CoV-2, since it is not  
222 only useful for deciphering its genome sequences and investigating its evolution and  
223 transmission, but also highly effective at determining whether individuals are part of the same  
224 transmission chain [10]. According to 2019nCoV-2, however, the ratio of sequenced samples  
225 to the number of confirmed cases is very low in some countries/regions (Figure S1), and even  
226 genome sequences are unavailable in some affected countries/regions. The SARS-CoV-2  
227 sampling bias and depth may lead to inaccurate transmission patterns and phylogenetic  
228 relationships [11]. Based on sequencing all infected cases in a single region, it has proved that  
229 the transmission of *Clostridium difficile* from symptomatic patients accounts for only one  
230 third of all infected cases [12]. As our current understanding is still very limited, we call for  
231 more efforts and collaborations in sequencing more SARS-CoV-2 genomes from both  
232 symptomatic and asymptomatic cases.

233

234 Besides, as these released SARS-CoV-2 genome sequences were generated by multiple  
235 different laboratories on different sequencing platforms, the quality of genome sequences is  
236 another important factor, such as the Ns of genome, which may affect variant calling and  
237 biased population frequency estimation. As mentioned in results, the frequency of Ns in some

238 genomic regions is high, possibly due to the low sequencing coverage, low-complexity of  
 239 sequence, low-efficiency of PCR primers used in sequencing library construction, secondary  
 240 structure of RNA, etc. However, most of the sequencing coverage information is unavailable,  
 241 making it challenging to evaluate whether the Ns were due to low sequencing coverage. By  
 242 further investigating those genomic regions with high frequency of Ns, we found (1) their GC  
 243 and AG contents are close to the average of the whole genome, excluding the possibility of  
 244 low complexity of sequence; (2) the length of these regions ranges from 210 to 320 bp  
 245 (similar to the length of PCR product) and more than 60% of the related sequences are  
 246 generated on Illumina platform (based on PCR amplification), suggesting that those Ns  
 247 regions may be resulted from low-efficiency of PCR Primers during sequencing library  
 248 construction; (3) by analyzing the secondary structure of these regions' RNA sequences, we  
 249 found the minimum free energy is lower than those randomly extracted regions, indicating  
 250 that the secondary structure is more stable and may affect the determination of genome  
 251 sequences(Figure S2). Our future efforts are to construct a recognized benchmark for quality  
 252 assessment and data filtration.

253

254 Compared to the early overly simplified L-S classification [8] and those comprehensive  
 255 lineages defined by Rambaut et al. [13], our classification scheme with nine clusters provides  
 256 a moderate system that can be correlated with the others (Table 2). The nine clusters could  
 257 also be grouped into three clades defined in [8, 10], namely, S (C02 and C04), G (C06, C08  
 258 and C09), and L (the rest clusters). Although haplotype network cannot give a precise  
 259 evolutionary position as phylogenetic trees do, it can be used to quickly inform the clustering  
 260 of viruses according to signature mutations in each haplotype. Definitely, new clusters will be  
 261 introduced as the virus is continuing to evolve.

262

263 A data-driven response to SARS-CoV-2 requires a public, free, and open-access data resource  
 264 that contains complete high-quality genome sequence data, and equips with automated online  
 265 pipelines to rapidly analyze genome sequences. Thus, 2019nCoV (together with other  
 266 resources in CNCB-NGDC) provides a wide range of data services, involving raw sequencing  
 267 data archive, genome sequence and meta information management with quality control and

268 curation, variation analysis and data presentation and visualization. Additionally, to facilitate  
 269 worldwide users to monitor any variant that may be associated with rapid transmission and  
 270 high virulence, 2019nCoV R, when compared to GISAID and NCBI Virus, features  
 271 spatiotemporal dynamic tracking for all identified variants. To better understand the  
 272 epidemiology of SARS-CoV-2, future directions are to collect ever more genome sequences  
 273 worldwide, include other types of omics data (such as transcriptome and epitranscriptome, if  
 274 available) [14] and also provide more friendly interfaces and online tools in support of  
 275 worldwide research activities.

276

## 277 **Methods**

### 278 **Data collection and integration**

279 All genome sequences as well as their related metadata were integrated from SARS-CoV-2  
 280 resources worldwide, including NCBI [5], GISAID [15], CNCB-NGDC [16], NMDC [17]  
 281 and CNGB [18]. To provide a non-redundant dataset, duplicated records from different  
 282 databases were identified and merged.

### 283 **Quality control and curation**

284 To determine the integrity of genome sequences, one sequence is defined as ‘Complete’ if it is  
 285 longer than 29000 bases and covers all protein-coding/CDS regions of SARS-CoV-2 (bases  
 286 266:29674 of GenBank: MN908947.3); otherwise, it is defined as “Partial”. Furthermore, to  
 287 examine the quality of genome sequences, unknown bases (Ns) and degenerate bases (Ds,  
 288 more than one possible base at a particular position and sometimes referred as “mixed bases”)  
 289 were counted for each sequence. By our default definition, one sequence is “high-quality” if  
 290  $Ns \leq 15$  and  $Ds \leq 50$ , and “low-quality” otherwise. Besides, any sequence is clearly labelled  
 291 when the number of variants  $\geq 15$  or the total number of deletion  $\geq 2$  or the distribution of  
 292 sequence variation is more aggregated (the ratio of the number of variants divided by the total  
 293 number of bases in a window  $\geq 0.25$ ).

### 294 **Variant identification and haplotype network construction**

295 Only complete and high-quality genome sequences were used for downstream analyses,  
 296 including sequence comparison, variant identification, functional annotation, and haplotype

297 network construction. Genome sequence alignment was performed with Muscle (3.8.31) [19]  
 298 by comparing against the earliest released SARS-CoV-2 genome (MN908947.3). Sequence  
 299 variation was identified directly using an in-house Perl program. The effect of variants was  
 300 determined using VEP (ENSEMBL Variant Effect Predictor) [20].

301

302 SARS-CoV-2 haplotypes were constructed based on short pseudo sequences that consist of all  
 303 variants (filtering out variations located in UTR regions) only. Then, all these pseudo  
 304 sequences were clustered into groups, and each group (a haplotype) represents a unique  
 305 sequence pattern. The haplotype network was inferred from all identified haplotypes, where  
 306 the reference sequence haplotype was set as the starting node, and its relationship with other  
 307 haplotypes was determined according to the inheritance of mutations. As a result, nine major  
 308 haplotype network clusters (denoted as C01–C09) were obtained according to the  
 309 phylogenetic tree-and-branch structure and those shared landmark mutations (Table 1).

310 Specifically, mutations with PMF $\geq$ 5% (except for ATG deletion at position1605, PMF $\approx$ 3% )  
 311 were selected, and those co-occurred mutations were determined by LD linkage analysis. A  
 312 cluster was referred to sequences with those co-occurred landmark mutations.

313

#### 314 **Data availability**

315 SARS-CoV-2 genomes, variants (in vcf format) and their annotations are publicly available at  
 316 <https://bigd.big.ac.cn/ncov/>.

317

#### 318 **CRedit author statement**

319 **Shuhui Song:** Conceptualization, Methodology, Data Analysis, Writing Original Paper,  
 320 Reviewing and Editing **Lina Ma:** Data curation, Methodology, Writing **Dong Zou:** System  
 321 Development, Writing **Dongmei Tian:** Methodology, Data Analysis **Cuiping Li:**  
 322 Methodology, Data Analysis **Junwei Zhu:** System Development **MeiliChen:** Data curation  
 323 **Anke Wang:** System Development **Yingke Ma:** System Development **MengWei Li:**  
 324 Methodology, System Development **Xufei Teng:** Visualization **Ying Cui:** Data curation  
 325 **Guangya Duan:** Data curation **Mochen Zhang:** Data curation **Tong Jin:** Data curation  
 326 **Chengmin Shi:** Methodology **Zhenglin Du:** Methodology **Yadong Zhang:** Methodology



327 **Chuandong Liu:** Methodology **Rujiao Li:** Data curation **Jingyao Zeng:** Data curation **Lili**  
 328 **Hao:** Data curation **Shuai Jiang:** Methodology **Hua Chen:** Supervision **Dali Han:**  
 329 Supervision **Jingfa Xiao:** Supervision, Methodology **Zhang Zhang:** Conceptualization,  
 330 Supervision, Reviewing and Editing **Wenming Zhao:** Conceptualization, Supervision,  
 331 Methodology **Yongbiao Xue:** Conceptualization, Supervision **Yimin Bao:** Conceptualization,  
 332 Supervision, Reviewing and Editing

333

### 334 **Competing interests**

335 The authors have declared no competing interests.

336

### 337 **Funding**

338 This work was supported by grants from The Strategic Priority Research Program of the  
 339 Chinese Academy of Sciences [XDA19090116 to S.S., XDA19050302 to Z.Z.,  
 340 XDB38030400 to L.M.], National Key R&D Program of China [2020YFC0848900,  
 341 2016YFE0206600, 2017YFC0907502], 13th Five-year Informatization Plan of Chinese  
 342 Academy of Sciences [XXH13505-05], Genomics Data Center Construction of Chinese  
 343 Academy of Sciences [XXH-13514-0202], The Professional Association of the Alliance of  
 344 International Science Organizations [ANSO-PA-2020-07], The Open Biodiversity and Health  
 345 Big Data Programme of IUBS, International Partnership Program of the Chinese Academy of  
 346 Sciences [153F11KYSB20160008]. K. C. Wong Education Foundation to Z.Z., and The  
 347 Youth Innovation Promotion Association of Chinese Academy of Science [2017141 to S.S.,  
 348 2019104 to L.M.]; Funding for open access charge: The Strategic Priority Research Program  
 349 of the Chinese Academy of Sciences.

350

### 351 **Acknowledgements**

352 We thank our colleagues and students for their hard working on the 2019nCoV  
 353 (<https://bigd.big.ac.cn/ncov>). We also thank a number of users and CNCB-NGDC members  
 354 for reporting bugs and sending comments. Complete genome sequences used for analyses  
 355 were obtained from the CNCB-NGDC, CNGBdb, GenBank, GISAID, and NMDC databases.  
 356 We acknowledge the sample providers and data submitters listed on Table S1

357

358 **Authors' ORCID ID**

359 0000-0003-2409-8770 (Shuhui Song)

360 0000-0001-6390-6289 (Lina Ma)

361 0000-0002-7169-4965 (Dong Zou)

362 0000-0003-0564-625X (Dongmei Tian)

363 0000-0002-7144-7745 (Cuiping Li)

364 0000-0003-4689-3513 (Junwei Zhu)

365 0000-0003-0102-0292 (Meili Chen)

366 0000-0002-2565-2334 (Anke Wang)

367 0000-0002-9460-4117 (Yingke Ma)

368 0000-0001-6163-2827 (Mengwei Li)

369 0000-0001-9282-4282 (Xufei Teng)

370 0000-0001-9201-0465 (Ying Cui)

371 0000-0003-4582-5156 (Guangya Duan)

372 0000-0001-9136-451X (MoChen Zhang)

373 0000-0003-0791-2822 (Tong Jin)

374 0000-0003-0237-4092 (Chengmin Shi)

375 0000-0003-2147-3475 (Zhenglin Du)

376 0000-0003-0918-5673 (Yadong Zhang)

377 0000-0002-9904-7786 (Chuandong Liu)

378 0000-0002-3276-8335 (Rujiao Li)

379 0000-0001-7364-9677 (Jingyao Zeng)

380 0000-0003-3432-7151 (Lili Hao)

381 0000-0002-6722-176X (Shuai Jiang)

382 0000-0002-9829-6561 (Hua Chen)

383 0000-0001-7119-1578 (Dali Han)

384 0000-0002-2835-4340 (Jingfa Xiao)

385 0000-0001-6603-5060 (Zhang Zhang)

386 0000-0002-4396-8287 (Wenming Zhao)

387 0000-0002-6895-8472 (Yongbiao Xue)

388 0000-0002-9922-9723 (Yimin Bao)

389

390

## 391 **References**

- 392 [1] Coronaviridae Study Group of the International Committee on Taxonomy of Viruses. The species  
393 Severe acute respiratory syndrome-related coronavirus: classifying 2019-nCoV and naming it  
394 SARS-CoV-2. *Nat Microbiol* 2020;5:536–44.
- 395 [2] Wu F, Zhao S, Yu B, Chen YM, Wang W, Song ZG, et al. A new coronavirus associated with human  
396 respiratory disease in China. *Nature* 2020;579:265–9.
- 397 [3] Zhang Z, Song S, Yu J, Zhao W, Xiao J, Bao Y. The Elements of Data Sharing. *Genomics*  
398 *Proteomics Bioinformatics* 2020;18:1–4.
- 399 [4] Shu Y, McCauley J. GISAID: Global initiative on sharing all influenza data - from vision to reality.  
400 *Euro Surveill* 2017;22:30494.
- 401 [5] O'Leary NA, Wright MW, Brister JR, Ciufo S, Haddad D, McVeigh R, et al. Reference sequence  
402 (RefSeq) database at NCBI: current status, taxonomic expansion, and functional annotation. *Nucleic*  
403 *Acids Res* 2016;44:D733–45.
- 404 [6] Zhao WM, Song SH, Chen ML, Zou D, Ma LN, Ma YK, et al. The 2019 novel coronavirus resource.  
405 *Yi Chuan* 2020;42:212–21. (in Chinese with an English abstract)
- 406 [7] Tang X, Wu C, Li X, Song Y, Yao X, Wu X, et al. On the origin and continuing evolution of  
407 SARS-CoV-2. *National Science Review* 2020;7:1012–23.
- 408 [8] Korber B, Fischer W, Gnanakaran S, Yoon H, Theiler J, Abfalterer W, et al. Spike mutation pipeline  
409 reveals the emergence of a more transmissible form of SARS-CoV-2. *bioRxiv* 2020;  
410 <https://doi.org/10.1101/2020.04.29.069054>.
- 411 [9] Bandelt HJ, Forster P, Rohl A. Median-joining networks for inferring intraspecific phylogenies. *Mol*  
412 *Biol Evol* 1999;16:37–48.
- 413 [10] Croucher NJ, Didelot X. The application of genomics to tracing bacterial pathogen transmission.  
414 *Curr Opin Microbiol* 2015;23:62–7.
- 415 [11] Mavian C, Pond SK, Marini S, Magalis BR, Vandamme AM, Dellicour S, et al. Sampling bias and  
416 incorrect rooting make phylogenetic network tracing of SARS-COV-2 infections unreliable. *Proc Natl*  
417 *Acad Sci U S A* 2020;117:12522–3.
- 418 [12] Eyre DW, Cule ML, Wilson DJ, Griffiths D, Vaughan A, O'Connor L, et al. Diverse sources of *C.*  
419 *difficile* infection identified on whole-genome sequencing. *N Engl J Med* 2013;369:1195–205.
- 420 [13] Rambaut A, Holmes EC, O'Toole A, Hill V, McCrone JT, Ruis C, et al. A dynamic nomenclature  
421 proposal for SARS-CoV-2 lineages to assist genomic epidemiology. *Nat Microbiol* 2020.  
422 <https://doi.org/10.1038/s41564-020-0770-5>
- 423 [14] Kim D, Lee JY, Yang JS, Kim JW, Kim VN, Chang H. The Architecture of SARS-CoV-2  
424 Transcriptome. *Cell* 2020;181:914–21 e10.
- 425 [15] Elbe S, Buckland-Merrett G. Data, disease and diplomacy: GISAID's innovative contribution to  
426 global health. *Glob Chall* 2017;1:33–46.
- 427 [16] National Genomics Data Center M, Partners. Database Resources of the National Genomics Data  
428 Center in 2020. *Nucleic Acids Res* 2020;48:D24–D33.

- 429 [17] Shi W, Qi H, Sun Q, Fan G, Liu S, Wang J, et al. gcMeta: a Global Catalogue of Metagenomics  
430 platform to support the archiving, standardization and analysis of microbiome data. *Nucleic Acids Res*  
431 2019;47:D637–D48.
- 432 [18] Xiao SZ, Armit C, Edmunds S, Goodman L, Li P, Tuli MA, et al. Increased interactivity and  
433 improvements to the GigaScience database, GigaDB. *Database (Oxford)* 2019;2019:1–9.
- 434 [19] Edgar RC. MUSCLE: multiple sequence alignment with high accuracy and high throughput.  
435 *Nucleic Acids Res* 2004;32:1792–7.
- 436 [20] McLaren W, Gil L, Hunt SE, Riat HS, Ritchie GR, Thormann A, et al. The Ensembl Variant Effect  
437 Predictor. *Genome Biol* 2016;17:122.
- 438 [21] Rego N, Koes D. 3Dmol.js: molecular visualization with WebGL. *Bioinformatics*  
439 2015;31:1322–4.

440

## 441 **Figure legends**

442 **Figure 1 Statistics and distribution of all released SARS-CoV-2 genomes.** (A) Distribution  
443 of released genome sequences by country, territory or region; (B) Number and percentage of  
444 complete and high-quality genomes; (C) Sequences number of different Ns ranges for  
445 low-quality genomes; (D) Frequency distribution of Ns across the whole genome.

446 **Figure 2 Landscape of genomic variants.** (A) Numbers of different mutation types  
447 (including SNPs, deletion, insertion, and indels; the orange bar represents all mutations while  
448 the blue bar represents mutations with PMF>0.001 ); (B) Structure display for  
449 nonsynonymous mutations; (C) Pie chart of variant annotation for each gene; (D) Population  
450 mutated frequency (PMF) for all variants.

451 **Figure 3 Spatiotemporal dynamics of genomic variants.**(A) Population mutation frequency  
452 (PMF) of variants over time; (B) PMF and cumulative sequence growth curve for position  
453 (n23403, pD614G); (C) Cumulative growth curve of the number of mutated sequences in  
454 selected countries for position (n23403, pD614G).

455 **Figure 4 The population mutated frequency (PMF) of G614 for each country over time.**

456 **Figure 5 Haplotype network and cluster identification and distribution.** (A) The snapshot  
457 of haplotype network dashboard, which can dynamically show the development of haplotype  
458 (I) across countries (II) and over time (III). Each node in the network represents a haplotype  
459 and the node size is proportional to the number of viral genome sequences, where the edge  
460 between any two nodes represents the genetic distance between two haplotypes (i.e. the  
461 number of mutation sites); (B-C) Schematic diagram of haplotype clusters (C01–C09) and

462 their corresponding common mutation sites for each cluster; (D) Distribution of C01–C09  
463 clusters across different continents; (E) Distribution of different clusters throughout the world  
464 and in three representative countries (US, UK and China).

465

# **Supplementary Figure and Table legend**

467 Figure S1 Distribution of genome sequence count divided by the number of confirmed cases  
468 for each country.

469 Figure S2 Compositional analysis of whole genome and two representative genomic regions  
470 with high frequency of Ns. (A) GC and AG Compositional variability; (B) Two representative  
471 genomic regions with high frequency of Ns and distribution of sequencing platforms for those  
472 corresponding sequences; (C) The secondary structure of one representative Ns region and  
473 one non-Ns region.

474 Table. S1 Coronavirus sequence datasets used for the study.

475

# **Table 1 Comparison of functional modules between two versions of 2019nCoV**

| Functionality                                         | Version 1 | Version 2 |
|-------------------------------------------------------|-----------|-----------|
| Integration of coronavirus sequences                  | ✓         | ✓         |
| Genomic sequences and metadata of 2019-nCoV           | ✓         | ✓         |
| Variant statistics and visualization of 2019-nCoV     | ✓         | ✓         |
| Phylogenetic tree                                     | ✓         | ✓         |
| Raw sequence data submission                          | ✓         | ✓         |
| Genome assembly submission                            | ✓         | ✓         |
| Literature                                            |           | ✓         |
| Clinical information                                  |           | ✓         |
| Sequence integrity and quality assessment             |           | ✓         |
| Variant annotation based on 3D structures (S Protein) |           | ✓         |
| Spatiotemporal dynamics analysis of genomic variants  |           | ✓         |
| Haplotype network and dynamic evolution               |           | ✓         |
| AI diagnosis and online tools                         |           | ✓         |
| Enhanced user-friendly interface                      |           | ✓         |

477

**Table 2 Signature mutations of haplotype clusters**

| Clade | Cluster ID | Genomic Location | Gene/Genomic Regions | Mutation | Amino acid Position and Change | Mutation Frequency | Number of Mutated Sequences | Classification in Lu et.al 2020 NSR <sup>a</sup> | Lineage in Rambaut et.al 2020 Nat Microbiol <sup>b</sup> |
|-------|------------|------------------|----------------------|----------|--------------------------------|--------------------|-----------------------------|--------------------------------------------------|----------------------------------------------------------|
| L     | C01        | NA               | NA                   | NA       | NA                             | NA                 | NA                          | L                                                | B/B.3/B.1.3 etc.                                         |
|       | C03        | 11083            | <i>ORF1ab</i>        | G->T     | p.3606L>F                      | 0.09               | 2982                        | L                                                | B.2/B.2.1/B.4 etc.                                       |
|       | C05        | 26144            | <i>ORF3a</i>         | G->T     | p.251G>V                       | 0.05               | 1592                        | L                                                | B/B.2                                                    |
|       | C07        | 1604             | <i>ORF1ab</i>        | AATG->A  | p.447-448ND>N                  | 0.02               | 503                         | L                                                | B/B.8                                                    |
| S     | C02        | 8782             | <i>ORF1ab</i>        | C->T     | p.2839S                        | 0.09               | 3034                        | S                                                | A/A.3/A.4/A.5                                            |
|       |            | 28144            | <i>ORF8</i>          | T->C     | p.84L>S                        | 0.09               | 3063                        |                                                  |                                                          |
|       | C04        | 17747            | <i>ORF1ab</i>        | C->T     | p.5828P>L                      | 0.05               | 1644                        | S                                                | A.1/A.1.1/A.1.2                                          |
|       |            | 17858            | <i>ORF1ab</i>        | A->G     | p.5865Y>C                      | 0.05               | 1657                        |                                                  |                                                          |
|       |            | 18060            | <i>ORF1ab</i>        | C->T     | p.5932L                        | 0.05               | 1695                        |                                                  |                                                          |
| G     | C06        | 241              | <i>5'UTR</i>         | C->T     |                                | 0.75               | 24028                       | L                                                | B.1/B.1.5/B.1.11 etc.                                    |
|       |            | 3037             | <i>ORF1ab/nsp4</i>   | C->T     | p.924F                         | 0.75               | 24045                       |                                                  |                                                          |
|       |            | 14408            | <i>ORF1ab/RdRp</i>   | C->T     | p.4715P>L                      | 0.75               | 24055                       |                                                  |                                                          |
|       |            | 23403            | <i>S</i>             | A->G     | p.614D>G                       | 0.76               | 24128                       |                                                  |                                                          |
|       | C08        | 28881            | <i>N</i>             | G->A     | p.203R>K                       | 0.25               | 8003                        | L                                                | B.1/B.1.1/B.1.10 etc.                                    |
|       |            | 28883            | <i>N</i>             | G->C     | p.204G>R                       | 0.25               | 7995                        |                                                  |                                                          |
|       |            | 28882            | <i>N</i>             | G->A     | p.203R                         | 0.25               | 7985                        |                                                  |                                                          |
|       | C09        | 1059             | <i>ORF1ab</i>        | C->T     | p.265T>I                       | 0.23               | 7357                        | L                                                | B.1/B.1.21/B.1.43                                        |
|       |            | 25563            | <i>ORF3a</i>         | G->T     | p.57Q>H                        | 0.30               | 9594                        |                                                  |                                                          |

Note: <sup>a</sup> Tang X, Wu C, Li X, Song Y, Yao X, Wu X, et al. On the origin and continuing evolution of SARS-CoV-2. National Science Review 2020.

<sup>b</sup> Rambaut A, Holmes EC, O'Toole A, Hill V, McCrone JT, Ruis C, et al. A dynamic nomenclature proposal for SARS-CoV-2 lineages to assist genomic epidemiology. Nat Microbiol 2020.

**A**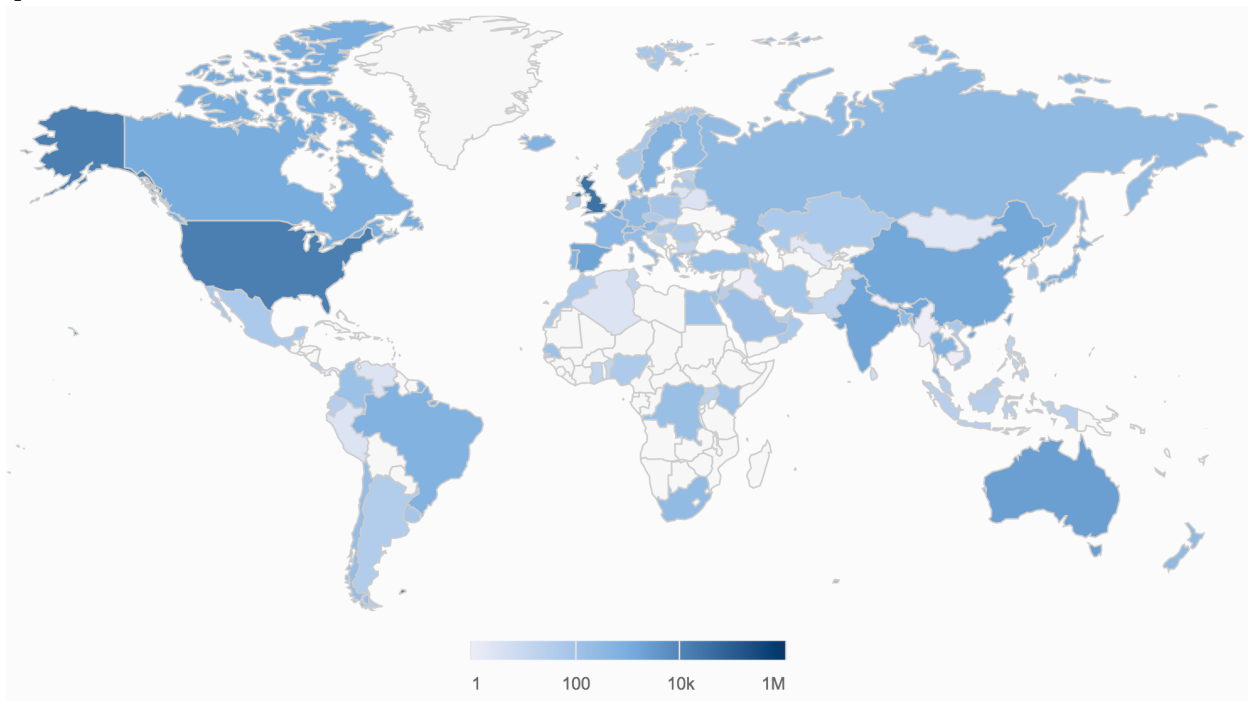**B**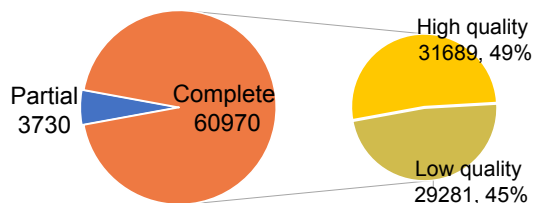**C**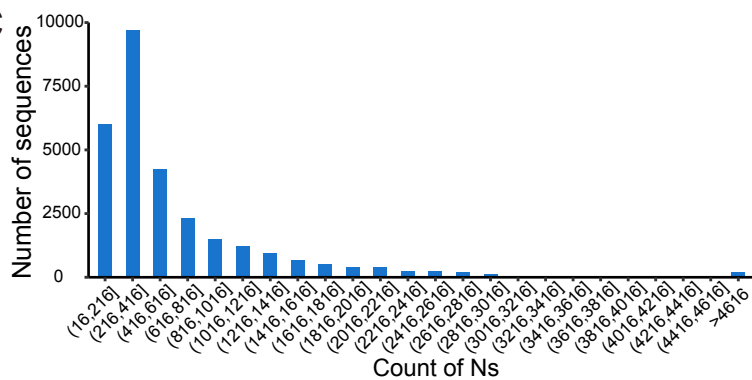**D**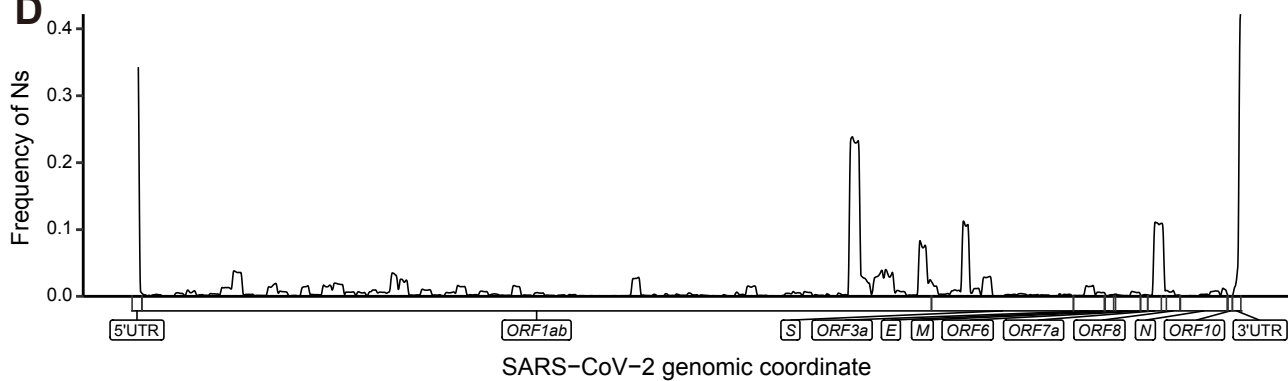



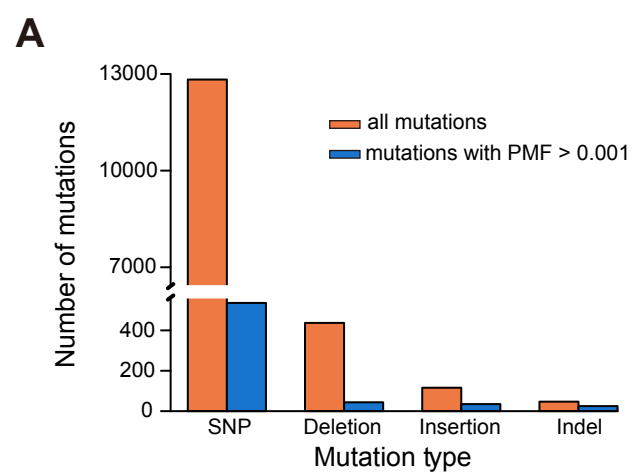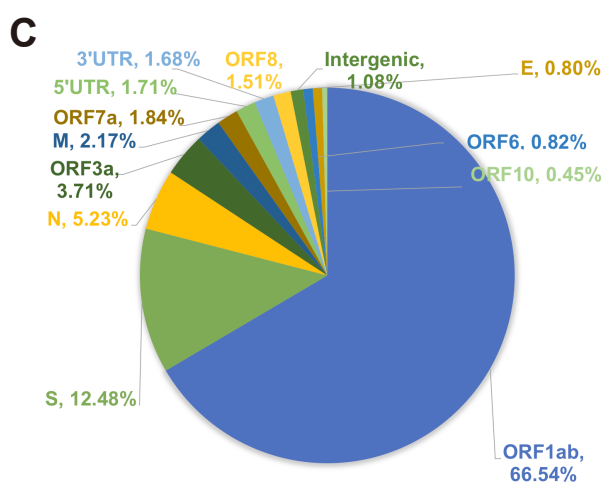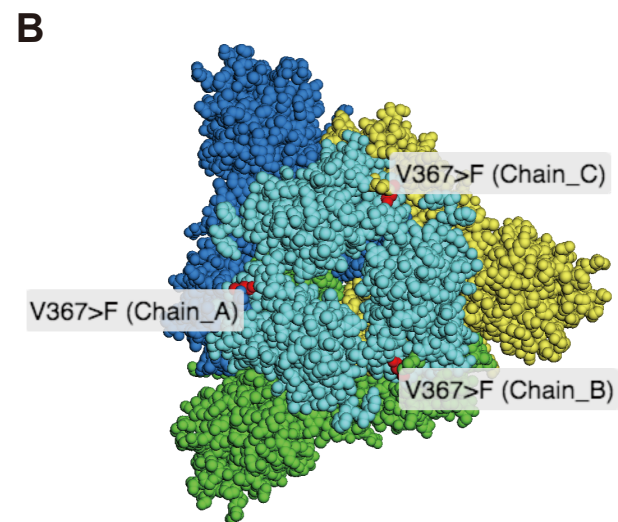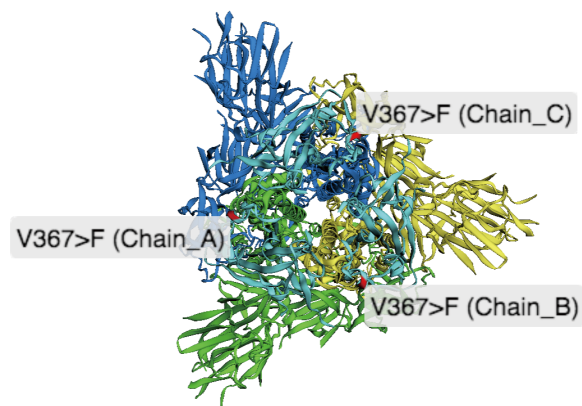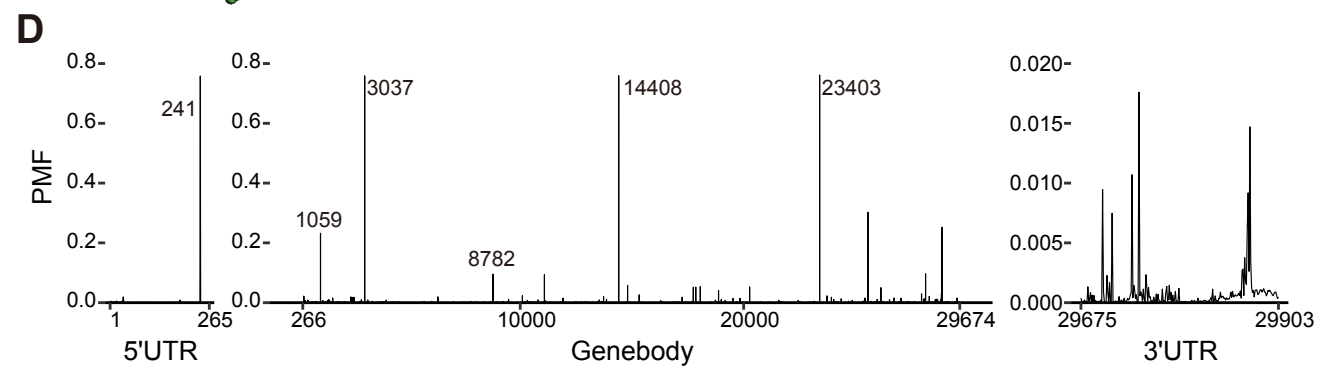

**A**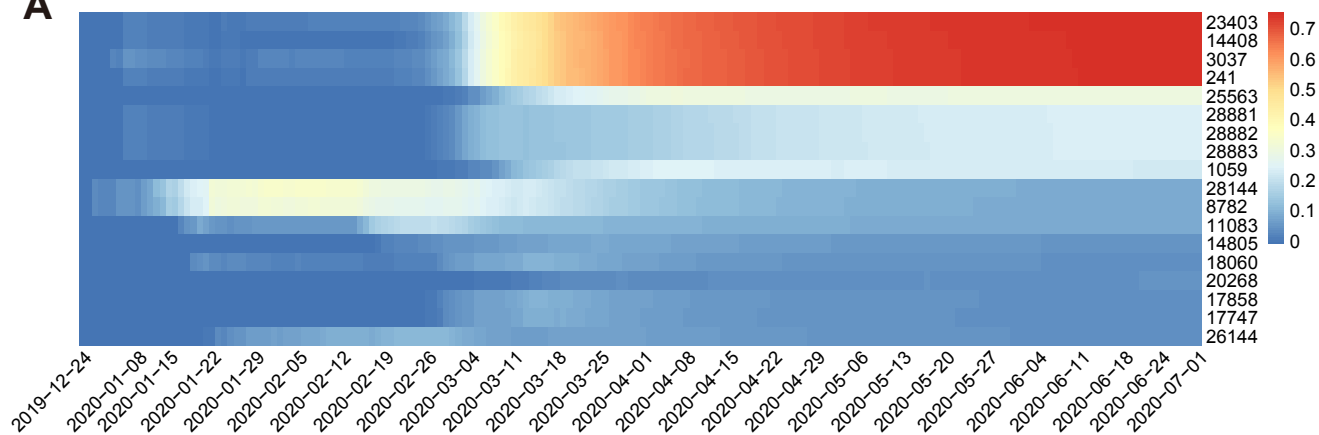**B**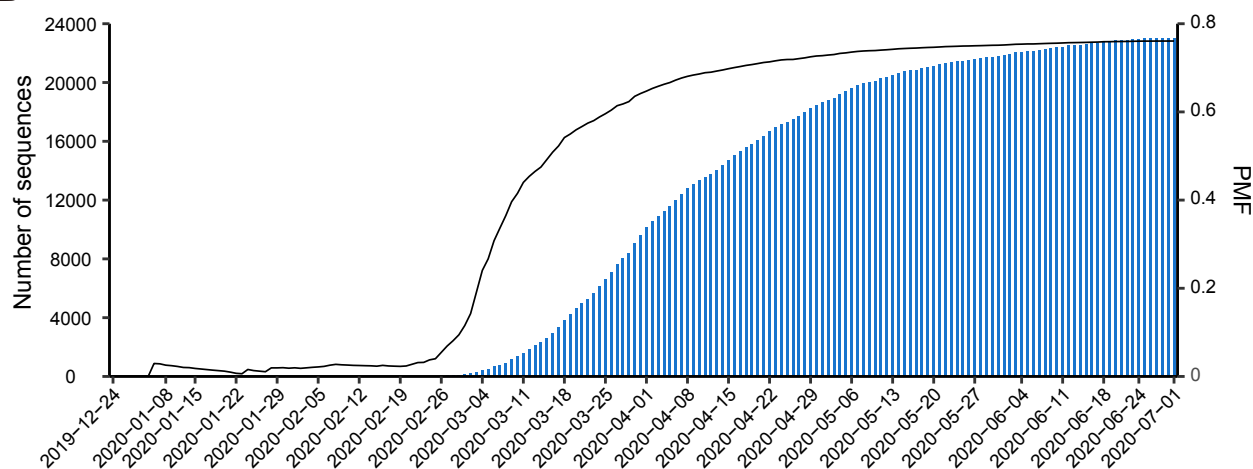**C**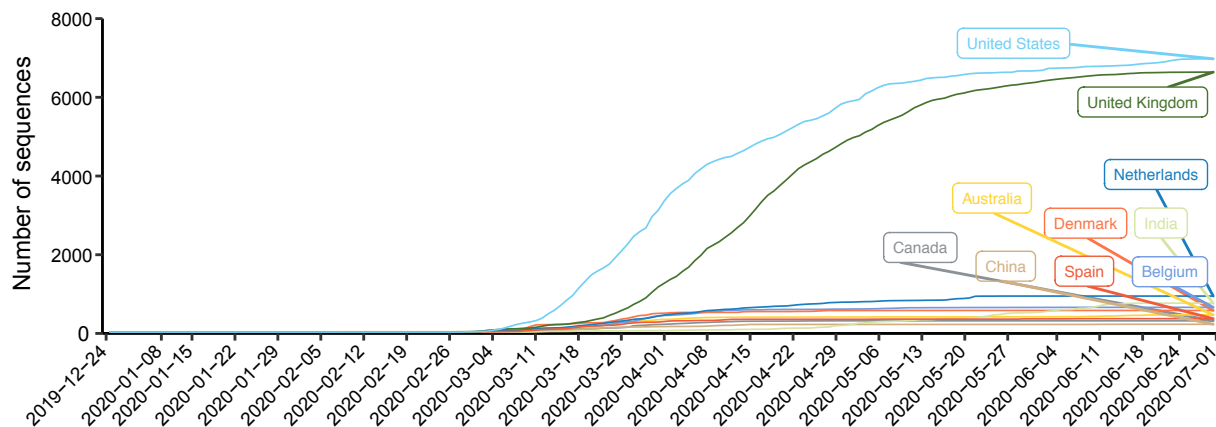

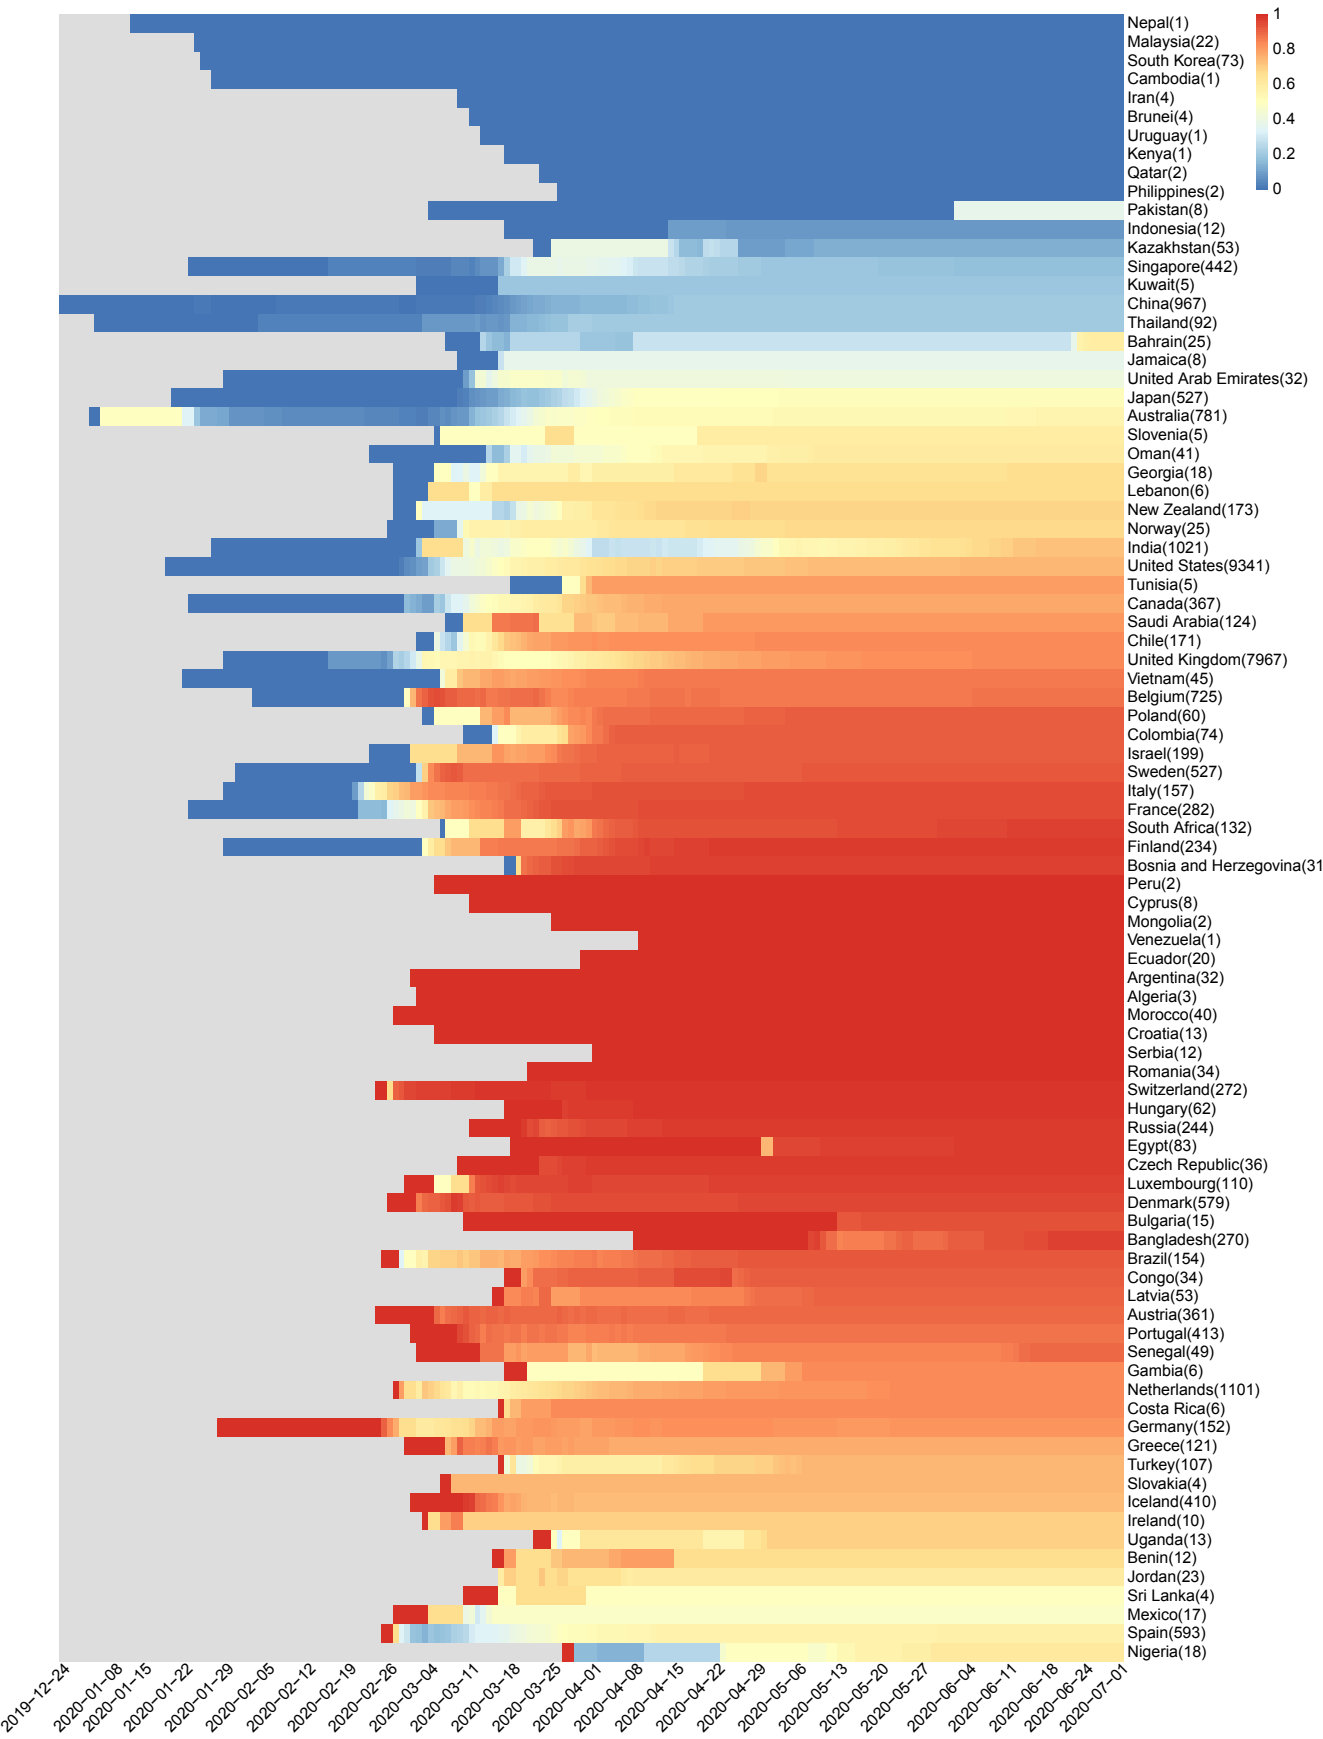

A

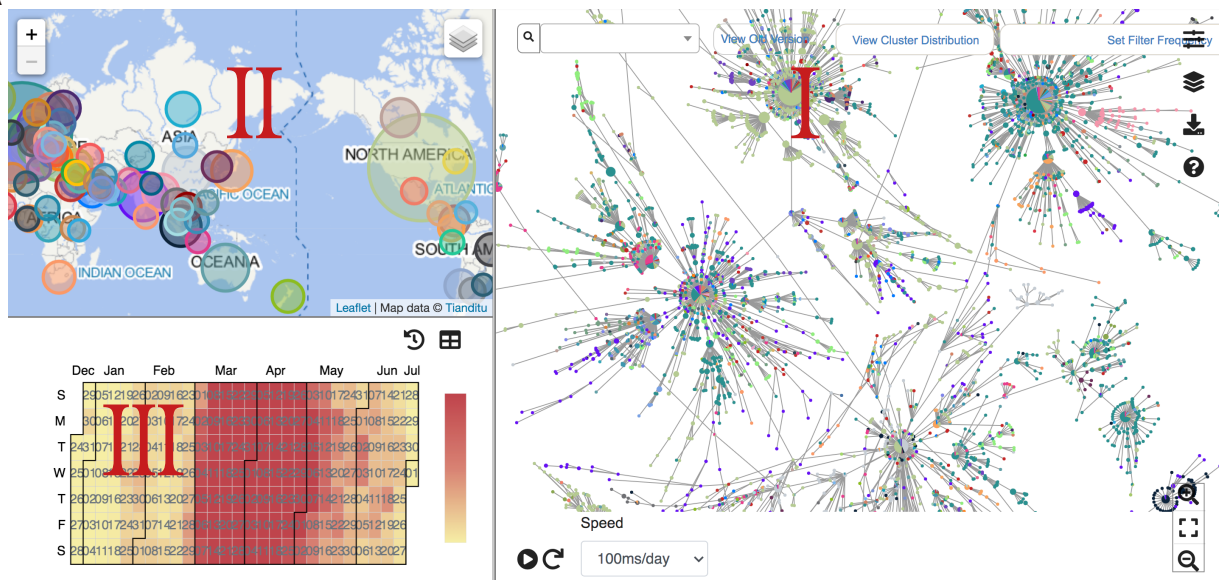

B

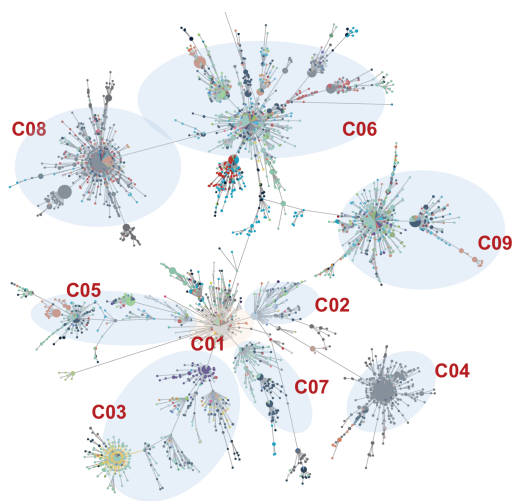

C

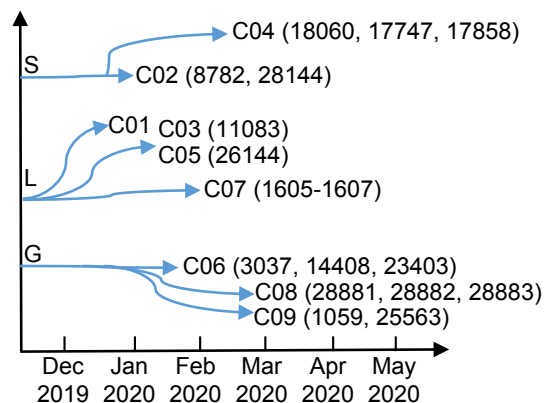

D

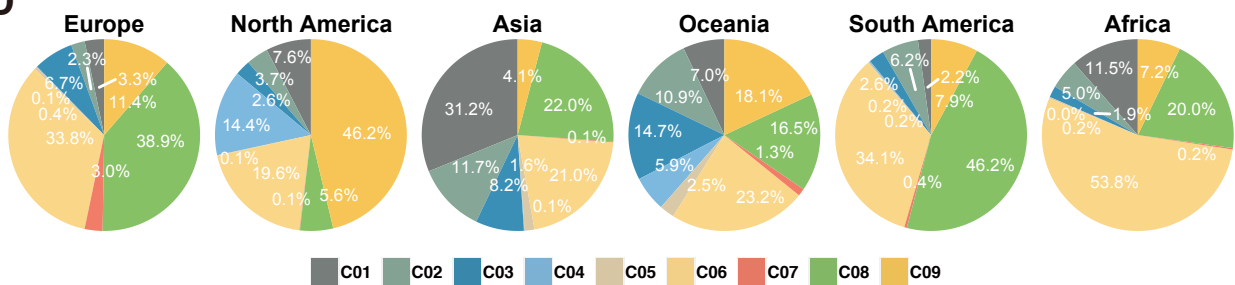

E

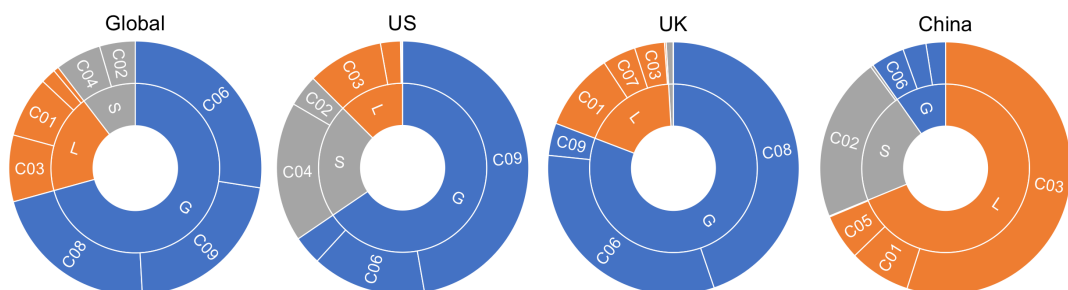

Source: https://www.biorxiv.org/content/10.1101/2020.08.30.273235v2.full.pdf
